1 Alignment-based protein mutational landscape prediction:  
2 doing more with less

3 Marina Abakarova<sup>1,2+</sup>, Céline Marquet<sup>3,4+</sup>, Michael Rera<sup>2</sup>, Burkhard Rost<sup>3,5,6</sup>,  
4 Elodie Laine<sup>1\*</sup>

5 December 13, 2022

6 <sup>1</sup> Sorbonne Université, CNRS, IBPS, Laboratory of Computational and Quantitative Biology (LCQB), UMR  
7 7238, Paris, 75005, France

8 <sup>2</sup> Université Paris Cité, INSERM UMR U1284, 75004 Paris, France

9 <sup>3</sup> Department of Informatics, Bioinformatics and Computational Biology - i12, TUM-Technical University  
10 of Munich, Boltzmannstr. 3, Garching, 85748 Munich, Germany

11 <sup>4</sup> TUM Graduate School, Center of Doctoral Studies in Informatics and its Applications (CeDoSIA), Boltz-  
12 mannstr. 11, 85748 Garching, Germany

13 <sup>5</sup> Institute for Advanced Study (TUM-IAS), Lichtenbergstr. 2a, Garching, 85748 Munich, Germany

14 <sup>6</sup> TUM School of Life Sciences Weihenstephan (TUM-WZW), Alte Akademie 8, Freising, Germany  
15

16 <sup>+</sup> equally contributing authors

17 <sup>\*</sup> corresponding author: [elodie.laine@sorbonne-universite.fr](mailto:elodie.laine@sorbonne-universite.fr)

## Abstract

Recent efforts for democratising protein structure prediction have leveraged the MMseqs2 algorithm to efficiently generate multiple sequence alignments with high diversity and a limited number of sequences. Here, we investigated the usefulness of this strategy for mutational outcome prediction. We place ourselves in a context where we only exploit information coming from the input alignment for making predictions. Through a large-scale assessment of  $\sim 1.5$ M missense variants across 72 protein families, we show that the MMseqs2-based protocol implemented in ColabFold compares favourably with tools and resources relying on profile-Hidden Markov Models. Our study demonstrates the feasibility of simultaneously providing high-quality and compute-efficient alignment-based predictions for the mutational landscape of entire proteomes.

## 1 Introduction

In recent years, tremendous progress has been achieved in the prediction of protein 3D structures and mutational landscapes [1, 2] by leveraging the wealth of publicly available natural protein sequence data [3, 4, 5, 6, 7, 8, 9, 10, 11, 12, 13]. State-of-the-art predictors capture arbitrary range dependencies between amino acid residues by implicitly accounting for global sequence contexts or explicitly exploiting structured information coming from alignments of evolutionary related protein sequences. Very efficient algorithms, *e.g.* MMseqs2 [14], allow for identifying homologous sequences and aligning them on a mass scale. Others relying on profile hidden Markov models (HMMs), such as JackHMMer/HMMer [15], carefully generate very large families, achieving a very high sensitivity. Several large-scale resources like Pfam [16] and ProteinNet [17] give access to pre-computed multiple sequence alignments (MSAs) built from profile HMMs. These MSAs are associated with curated protein families in Pfam, or with experimentally resolved protein 3D structures in ProteinNet. The depth, quality, and computational cost of a MSA are important factors contributing to its effective usefulness. Nevertheless, precisely assessing the impact of expanding or filtering out sequences on predictive performance is difficult. For protein structure prediction, Mirdita and co-authors showed that AlphaFold2 original performance could be attained with much smaller and cheaper alignments through the MMseqs2 [14]-based strategy implemented in ColabFold [3].

In this work, we tested whether the same gain could be achieved for mutational outcome prediction. We compared the prediction accuracy achieved by Global Epistatic Model for predicting Mutational Effects (GEMME) [20] from MSAs generated using the ColabFold’s MMseqs2-based protocol [3, 14] versus three classical workflows relying on profile HMMs [17, 16, 18]. GEMME is a fast MSA-based mutational outcome predictor relying on a few biologically meaningful and interpretable parameters. It performs on-par with statistical inference-based methods estimating pairwise couplings [21] and also deep learning-based methods, including family-specific models [22, 23, 24, 25] as well as high-capacity protein language models trained across protein families [18, 26, 27] (**Fig. S1**, see also [24, 26, 20] for quantitative comparisons). We assessed GEMME predictions against a large collection of 87 Deep Mutational Scanning experiments (DMS) totalling  $\sim 1.5$ M missense variants across 72 diverse protein families [18]. We used the Spearman rank correlation coefficient to quantify the accuracy of the predictions, as previously done by us and others [18, 27, 20].

## 2 Materials and Methods

### 2.1 DMS benchmark set

We downloaded the ProteinGym substitution benchmark [18] from the following repository: <https://github.com/OATML-Markslab/Tranception>. It contains measurements from 87 DMS collected for 72 proteins of various sizes (between 72 and 3,423 residue long), functions (*e.g.* kinases, ion channels, g-protein coupled receptors, polymerases, transcription factors, tumor suppressors), and origins (**Fig. S2A-C**). The DMS cover a wide range of functional properties, including thermostability, ligand binding, aggregation, viral replication, and drug resistance. Up to four experiments are reported for each protein (**Fig. S2D**). Although the benchmark mostly focuses on single point mutations, it also reports multiple amino-acid variant measurements for 11 proteins (**Table S1**).

### 2.2 MSA resources and protocols

We considered four different MSA generation protocols and resources, referred to as ProteinGym, ColabFold, ProteinNet and Pfam (**Table 1**). They represent a variety of choices in terms of sequence database, search algorithm and sequence context. Two protocols, ColabFold and ProteinGym, were available for all 87 DMS (from 72 proteins) from the ProteinGym benchmark. ProteinNet was available for 51 (from 42 proteins), Pfam for 52 (from 39 proteins). When comparing two methods, we reduced the Spearman rank calculations to their common positions.

Table 1: Details about the MSA generation protocols.

| Name       | Databases                                         | Search algorithms | Fine tuning      | #(covered proteins) <sup>a</sup> | #(sequences) Min - Max |
|------------|---------------------------------------------------|-------------------|------------------|----------------------------------|------------------------|
| ProteinGym | UniRef100 [12]                                    | JackHMMer [15]    | yes <sup>b</sup> | 72                               | 44 - 539,868           |
| ColabFold  | UniRef30 [12] and ColabFold env. <sup>c</sup> [3] | MMseqs2 [14]      | no               | 72                               | 126 - 24,269           |
| ProteinNet | UniParc <sup>d</sup> [31] and IMG [13]            | JackHMMer [15]    | no               | 42                               | 249 - 1,389,216        |
| Pfam       | UniProtKB [5]                                     | HMMer [15]        | yes <sup>e</sup> | 39 <sup>f</sup>                  | 134 - 283,380          |

<sup>a</sup>We indicate the number of proteins treated with each protocol, out of the 72 proteins comprised in the ProteinGym substitution benchmark. <sup>b</sup>For each protein, 9 MSAs were generated by exploring bit score thresholds from 0.1 to 0.9 and the MSA leading to the highest number of significant Evolutionary Couplings [21] was retained. <sup>c</sup>ColabFold environmental database contains BFD [6], which includes UniProt/TrEMBL+Swissprot, Mgnify [9], MetaEuk [10], SMAG [4], TOPAZ [34], MGv [7], GPD [8], and MetaClust2 [11]. <sup>d</sup>UniParc, for UniProt Archive, is a non-redundant archive of protein sequences extracted from more than 10 public databases, including UniProtKB, Ensembl [35], PDB, FlyBase [36] and WormBase [37]. <sup>e</sup>For each Pfam family, the profile HMM used to query UniProtKB was hand curated, and the score threshold used to select the sequences was set manually. <sup>f</sup>For this protocol, we considered a non-redundant subset of 59 proteins.

**The ColabFold protocol [3]** relies on the very fast MMseqs2 method [14] (3 iterations) to search against UniRef30, a 30% sequence identity clustered database based on UniProt [5], and a novel database

74 compiling several environmental sequence sets (**Table 1**). It maximises diversity while limiting the number  
75 of sequences through an expand-and-filter strategy. Specifically, it iteratively identifies representative hits,  
76 expand them with their cluster members, and filters the latter before adding them to the MSA. We used  
77 the same sequence queries as those defined in ProteinGym. For all but 5 proteins, the query corresponds to  
78 the full-length UniProt sequence. For each query, we generated two MSAs by searching against UniRef30  
79 and ColabFold environmental database, respectively, and we then concatenated them.

80 **The ProteinGym protocol [18]** relies on the highly sensitive homology detection method JackHM-  
81 Mer [15] (5 iterations) to search against UniRef100 [12], the non-redundant version of UniProt (**Table 1**).  
82 JackHMMer is part of the HMMer suite and is based on profile hidden Markov models (HMMs). This  
83 protocol is relatively costly, with up to several hours for a single input MSA. The MSAs generated with this  
84 protocol have been widely used to assess mutational outcome predictors [18, 21]. In this work, we took the  
85 alignments provided with the ProteinGym benchmark [18].

86 **The ProteinNet protocol [17]** also performs 5 iterations of JackHMMER, but it extends the sequence  
87 database to the whole UniProt Archive (Uniparc) [31] complemented with metagenomic sequences from IMG  
88 [13] (**Table 1**). Another difference from ProteinGym is that the queries correspond to sequences extracted  
89 from experimentally determined protein structures available in the PDB [19]. The MSAs are readily available  
90 and organised in a series of data sets, each one encompassing all proteins structurally characterised prior to  
91 different editions of the Critical Assessment of protein Structure Prediction (CASP) [32]. We chose the most  
92 complete set, namely ProteinNet12. It covers all proteins whose structure was deposited in the PDB before  
93 2016, the year of CASP round XII [33]. For each protein from the ProteinGym benchmark, we retrieved  
94 the corresponding PDB codes from the Uniprot website (<https://www.uniprot.org>) and picked up the  
95 structure with the highest coverage among those represented in ProteinNet12 (**Table S1**). We could treat  
96 42 proteins, out of 72 in total. For the remaining ones, the positions covered by the available MSAs were  
97 out of the range of mutated positions.

98 **The Pfam database [16]** is a resource of manually curated protein domain families. Each family,  
99 sometimes referred to as a Pfam-A entry, is associated with a profile HMM built using a small number of  
100 representative sequences, and several MSAs. We chose to work with the full UniProt alignment, obtained  
101 by searching the family-specific profile-HMM against UniProtKB (**Table 1**). The proteins sharing the same  
102 domain composition will have exactly the same MSAs. To avoid such redundancy, we focused on a subset  
103 of 59 proteins extracted with an adjusted version of UniqueProt [29, 30]. Instead of PSI-BLAST we used  
104 MMseqs2 to improve runtime, and discarded alignments of less than 50 residues for pairs of sequences with  
105 at least 180 residues to prevent very short alignments from removing longer sequences. For each protein, we  
106 first retrieved its Pfam domain composition and downloaded the corresponding MSAs from the Pfam website  
107 (<https://pfam.xfam.org>, release 34.0). We could retrieve at least one (and up to 5) MSA overlapping with  
108 the range of mutated positions for 39 proteins (**Table S1**). Each detected Pfam domain appears only once  
109 in the set.

## 110 3 Results and Discussion

### 111 3.1 The ColabFold protocol leads to the most accurate predictions

112 ColabFold and ProteinGym are the best performing protocols and the only ones covering all  $\sim 1.5$ M mutations  
113 from the ProteinGym benchmark (**Table 2**). The ColabFold protocol allows obtaining more accurate  
114 predictions for two thirds of the DMS (**Fig. 1A**), while producing MSAs with substantially fewer sequences  
115 (**Fig. S3**). More precisely, for the proteins with abundant sequence information (**Table 2**, "high" category  
116 based on ProteinGym MSAs), the accuracy is higher by  $\Delta\bar{\rho} = 0.032$  on average and the MSAs are shallower  
117 (**Fig. 1B**,  $N_{eff}$  ratio  $< 1$ , see red triangles). In fact, all proteins falling in the "high" alignment depth  
118 category ( $N_{eff}/L > 100$ , see *Materials and Methods*) based on their ProteinGym MSAs would be reclassified  
119 in the "medium" category ( $1 < N_{eff}/L < 100$ ) based on their ColabFold MSAs (**Fig. S4**). This observation  
120 highlights the relevance of ColabFold's MMseqs2-based expand-and-filter strategy for these cases. For the  
121 "medium" and "low" categories, the results are less clear. On the one hand, the ColabFold protocol increases  
122 the alignment depth for 24 proteins belonging to these categories (**Fig. 1B**, see green and blue triangles  
123 with  $N_{eff}$  ratio  $> 1$ ). For instance, for the SARS-CoV-2 Replicase polyprotein 1ab, GEMME could make  
124 predictions only with the ColabFold MSA, the variability of the ProteinGym MSA being too low (**Fig. 1A**,  
125 see null x-value). Overall, the accuracy gain resulting from the increased MSA depth is limited ( $\Delta\bar{\rho} =$   
126  $0.015 \pm 0.045$ ). On the other hand, ColabFold produces very shallow MSAs for the polymerases PA and PB2  
127 from influenza A virus (UniProt names: PA\_I34A1 and A4D664\_9INFA, respectively), 20 times shallower  
128 than those produced by ProteinGym, resulting in a dramatic deterioration of the prediction accuracy for  
129 these proteins (**Fig. 1B**, see the two outliers,  $\Delta\rho \sim -0.3$ ). This behaviour does not extend to the other  
130 viral proteins from the benchmark.

### 131 3.2 Expanding the sequence search space marginally improves predic- 132 tion accuracy

133 The ColabFold MSAs result from applying an MMseqs2-based search, expand and filter algorithm to both  
134 the UniRef30 database, and the ColabFold database comprising UniProt/TrEMBL, Swissprot, and several  
135 collections of environmental sequences (**Table 1**). We found that the ColabFold database marginally con-  
136 tributed to the mutational outcome predictions (**Fig. S5**). It proved necessary in only one case, the human  
137 SC6A4. In addition, it slightly improved prediction accuracy for a few viral proteins, yet without allowing  
138 reaching a good agreement with the experimental measurements – the Spearman rank correlation remains  
139 below 0.3 (**Fig. S5**). By contrast, it significantly deteriorated the predictions for the human KCNH2 by  
140  $\Delta\rho = -0.14$ . The limited influence of metagenomics can also be observed when using JackHMMer as the  
141 search algorithm, as attested by the similar performance obtained for ProteinGym (UniRef100) and Pro-  
142 teinNet (UniParc and IMG, see **Table 2**). By looking at the per-DMS Spearman rank correlations (**Fig.**  
143 **2A**), we could identify a few human proteins, namely P53, BRCA1, SUMO1, and YAP1, as well as IF1 and  
144 CCDB from *E. coli*, that benefited from the additional information exploited by ProteinNet. By contrast,  
145 the Spearman rank correlation computed for the yeast protein GAL4 dropped dramatically, from 0.497 to  
146 0.217. This result illustrates the interest of considering the full sequence context. While the ProteinGym  
147 protocol could retrieve 16,159 sequences by querying the full-length protein sequence, the ProteinNet MSA,

Table 2: Average Spearman’s rank correlation between predicted values and experimental measurements on the ProteinGym substitution benchmark.

| Set        | Class      | #(proteins) | #(DMS) | ColabFold    | ProteinGym   | ProteinNet | Pfam  |
|------------|------------|-------------|--------|--------------|--------------|------------|-------|
| All        |            | 72          | 87     | <b>0.470</b> | 0.463        | -          | -     |
|            | Low        | 14          | 20     | <b>0.453</b> | 0.444        | -          | -     |
|            | Medium     | 43          | 17     | 0.443        | <b>0.446</b> | -          | -     |
|            | High       | 15          | 50     | <b>0.552</b> | 0.520        | -          | -     |
|            | Human      | 26          | 32     | <b>0.445</b> | 0.436        | -          | -     |
|            | Eukaryote  | 10          | 13     | <b>0.500</b> | 0.479        | -          | -     |
|            | Prokaryote | 17          | 21     | <b>0.529</b> | 0.505        | -          | -     |
|            | Virus      | 19          | 21     | 0.429        | <b>0.451</b> | -          | -     |
| ProteinNet |            | 42          | 51     | <b>0.507</b> | 0.497        | 0.495      | -     |
|            | Human      | 19          | 23     | <b>0.484</b> | 0.466        | 0.477      | -     |
|            | Eukaryote  | 6           | 7      | <b>0.539</b> | 0.531        | 0.495      | -     |
|            | Prokaryote | 13          | 17     | <b>0.562</b> | 0.536        | 0.540      | -     |
|            | Virus      | 4           | 4      | 0.353        | <b>0.453</b> | 0.410      | -     |
| Pfam       |            | 39          | 52     | <b>0.463</b> | 0.440        | -          | 0.432 |
|            | Human      | 15          | 20     | <b>0.440</b> | 0.423        | -          | 0.407 |
|            | Eukaryote  | 7           | 10     | <b>0.462</b> | 0.448        | -          | 0.436 |
|            | Prokaryote | 9           | 13     | <b>0.517</b> | 0.489        | -          | 0.496 |
|            | Virus      | 8           | 9      | <b>0.438</b> | 0.399        | -          | 0.391 |

The  $N_{eff}$  categories *Low*, *Medium* and *High* were taken from [18] and correspond to the ProteinGym alignments. We use this classification as a reference, although proteins may change category between the different protocols (see **Fig. S4**). The Spearman rank correlations are computed either over all residues from the target sequences, or only the residue ranges covered by ProteinNet and Pfam, respectively. The correlations over the full-length versus partial proteins are comparable for ColabFold and ProteinGym protocols (**Fig. S6**).

148 which covers a very small portion of the protein (**Fig. 2A**, 6% that is 55 residues out of 881, PDB code:  
149 1HBW), comprises only 249 sequences.

### 150 3.3 A domain-focused perspective

151 The residue spans defined by the Pfam and ProteinNet MSAs correspond to well-curated or well-folded pro-  
152 tein domains. One may wonder whether the predictions are better in these regions compared to unannotated  
153 or disordered regions. In our experiment, we did not observe such a trend. The ColabFold and ProteinGym  
154 MSAs yielded comparable Spearman correlation coefficients over the full-length protein and over the regions  
155 annotated as Pfam domains or with experimentally resolved 3D structures (**Fig. S6**). Moreover, recon-  
156 structing a protein’s mutational landscape by combining predictions coming from different MSAs, each one  
157 representing a curated Pfam domain, proved less accurate than building a single query-specific full-length  
158 MSA (**Fig. S7**). Indeed, the ColabFold strategy led to a higher Spearman rank correlation than the Pfam  
159 protocol for 70% of the considered DMS (**Fig. 2C**). For the remaining 30%, the gain brought by Pfam does  
160 not exceed  $\Delta\rho_{max} = 0.077$ .

## 161 4 Conclusion

162 Overall, this study identified ColabFold as the best suited MSA generation protocol for assessing protein  
163 mutational outcomes. It yields the best performance and allows covering protein regions lacking structural  
164 data or domain annotations. It limits the number of sequences, thus preventing memory issues. It is  
165 faster than classical homology detection methods by orders of magnitude. The study also showed that the  
166 alignment depth is not a good indicator of the prediction accuracy as one might expect. The Spearman rank  
167 correlation can be as good as 0.7 even with shallow alignments. And above a certain threshold, adding more  
168 sequences does not improve the predictions. Moreover, extending the sequence search space to environmental  
169 datasets only marginally improves the accuracy of the predictions. Finally, readily available resources such  
170 as ProteinNet and Pfam are valid options, but they only provide a partial coverage of the query proteins.  
171 This study demonstrates the feasibility of MSA-based computational scans of entire proteomes at a very  
172 large scale. Combining ColabFold with GEMME, it takes only a few days to generate the complete single-  
173 mutational landscape of the human proteome on the supercomputer “MeSU” of Sorbonne University (64  
174 CPUs from Intel Xeon E5-4650L processors, 910GB shared RAM memory).

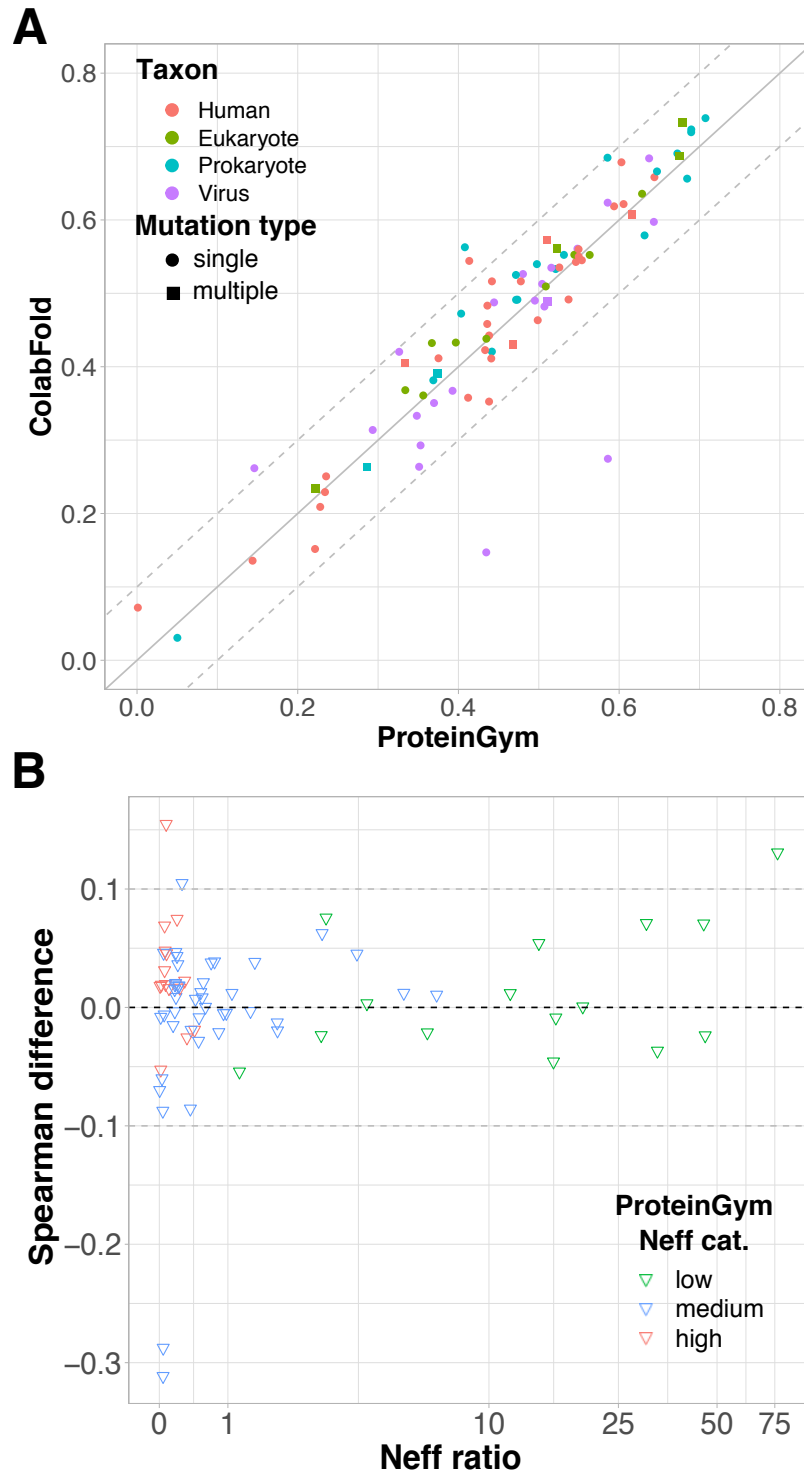

Figure 1: **Comparison of the ProteinGym and ColabFold protocols.** **A.** GEMME’s Spearman rank correlation coefficients ( $\rho$ ) computed against the 87 DMS sets from the ProteinGym substitution benchmark. The input MSAs were generated using the ProteinGym (x-axis) or ColabFold (y-axis) protocols. The colors indicate the taxons of the target sequences and the shapes indicate whether the experiment contains only single mutations (circle) or also multiple mutations (square). **B.** Differences in  $\rho$  values in function of the number of effective sequence ( $N_{eff}$ ) ratio. Positive values correspond to ColabFold performing better than ProteinGym. Each point (triangle) corresponds to a given input MSA (*i.e.* a given target sequence) and its y-value is averaged over the set of DMS experiments (between 1 and 4, see **Fig. S2**) associated to it. The colors indicate the depth of the ProteinGym MSAs, either low, medium or high, as defined in [18] (see also *Materials and Methods*).



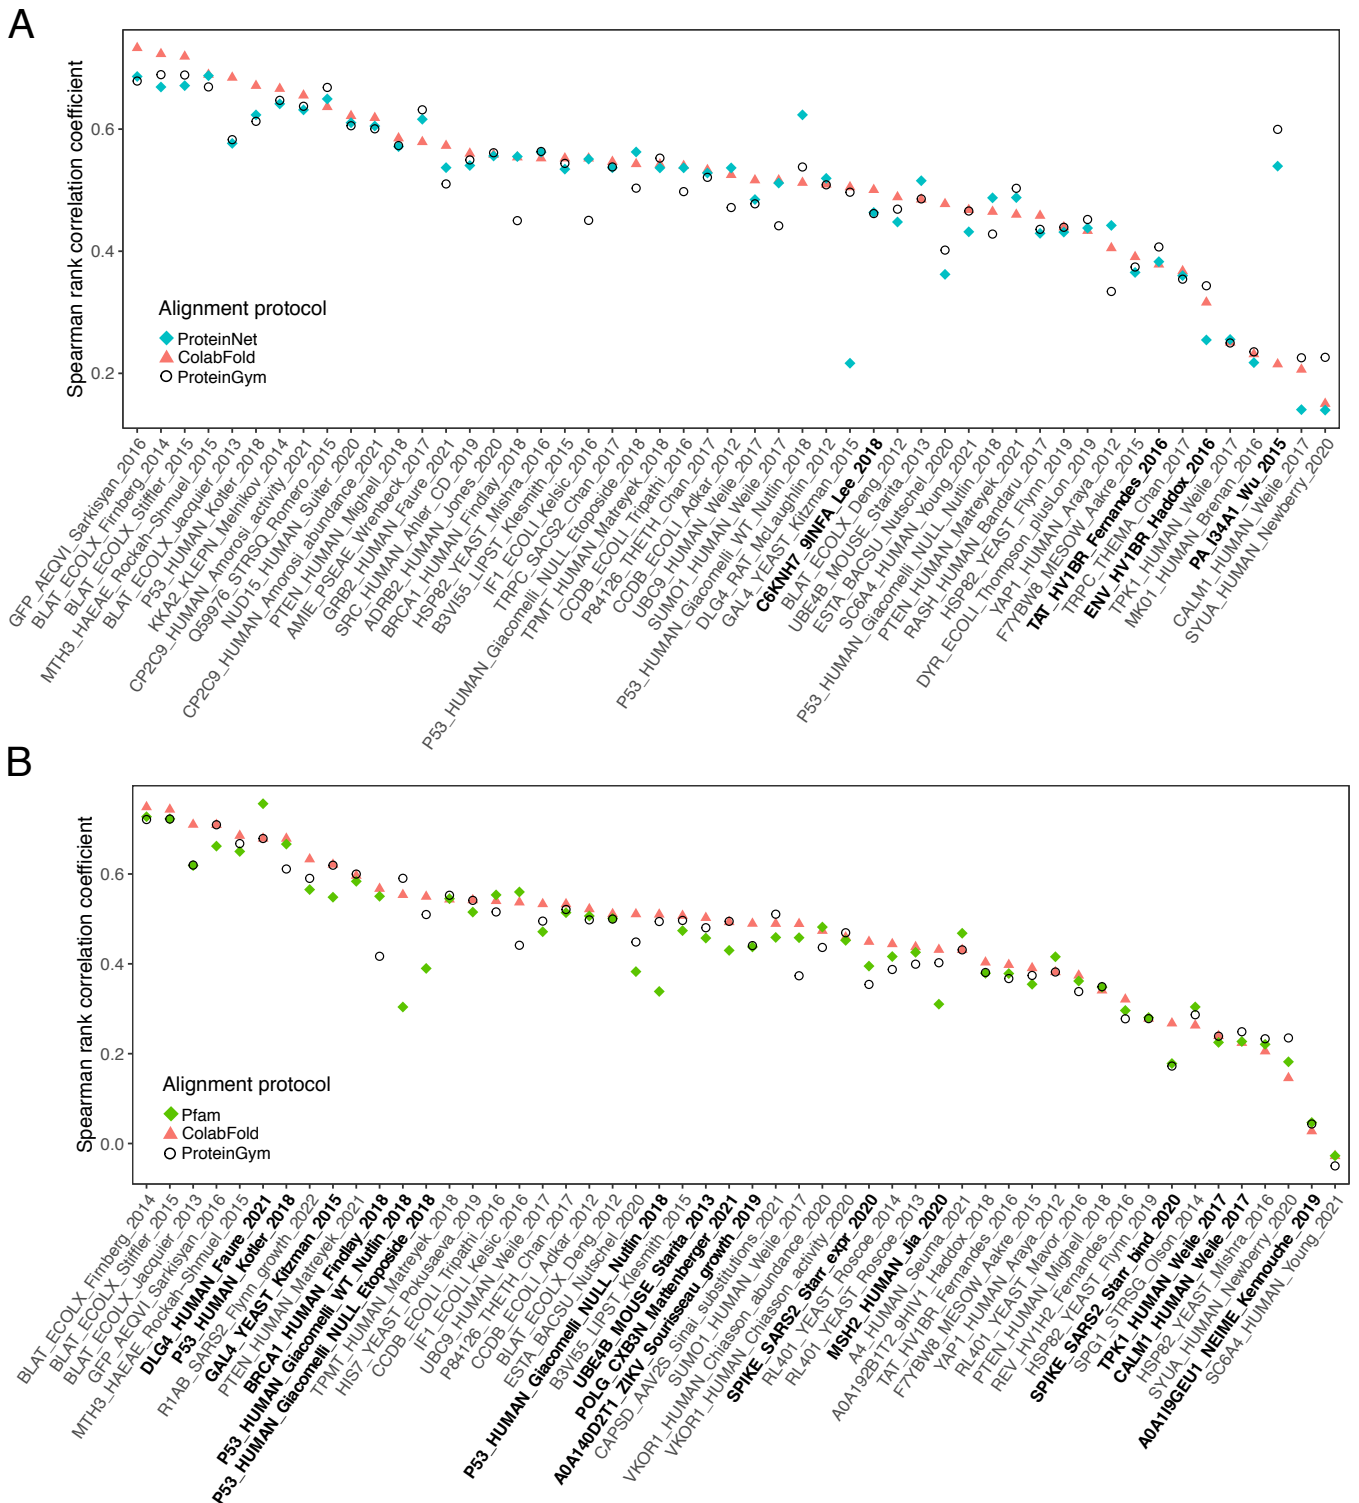

Figure 2: **Performance comparison between the different MSA generation protocols. A.** Comparison of ProteinNet, ColabFold and ProteinGym, focusing on the 51 DMS covered by ProteinNet (x-axis). The Spearman rank correlation coefficients are computed over the residue spans covered by ProteinNet MSAs for all methods. The DMS associated to viral proteins are highlighted in bold. **B.** Comparison of Pfam, ColabFold and ProteinGym, focusing on the 52 DMS covered by Pfam (x-axis). The Spearman rank correlation coefficients are computed over the residue spans covered by Pfam MSAs for all methods. The DMS associated to proteins containing more than one Pfam domains are highlighted in bold on the x-axis.

## 175 References

- 176 1. Method of the Year 2021: Protein structure prediction. *Nature Methods*. 2022;19(1):1–1.
- 177 2. Laine E, Eismann S, Elofsson A, Grudinin S. Protein sequence-to-structure learning: Is this the end  
178 (-to-end revolution)? *Proteins: Structure, Function, and Bioinformatics*. 2021;89(12):1770–1786.
- 179 3. Mirdita M, Schütze K, Moriwaki Y, Heo L, Ovchinnikov S, Steinegger M. ColabFold: making protein  
180 folding accessible to all. *Nature Methods*. 2022;p. 1–4.
- 181 4. Delmont TO, Gaia M, Hinsinger DD, Frémont P, Vanni C, Fernandez-Guerra A, et al. Functional  
182 repertoire convergence of distantly related eukaryotic plankton lineages abundant in the sunlit ocean.  
183 *Cell Genomics*. 2022;2(5):100123.
- 184 5. UniProt: the universal protein knowledgebase in 2021. *Nucleic acids research*. 2021;49(D1):D480–  
185 D489.
- 186 6. Jumper J, Evans R, Pritzel A, Green T, Figurnov M, Ronneberger O, et al. Highly accurate protein  
187 structure prediction with AlphaFold. *Nature*. 2021;596(7873):583–589.
- 188 7. Nayfach S, Páez-Espino D, Call L, Low SJ, Sberro H, Ivanova NN, et al. Metagenomic compendium  
189 of 189,680 DNA viruses from the human gut microbiome. *Nature microbiology*. 2021;6(7):960–970.
- 190 8. Camarillo-Guerrero LF, Almeida A, Rangel-Pineros G, Finn RD, Lawley TD. Massive expansion of  
191 human gut bacteriophage diversity. *Cell*. 2021;184(4):1098–1109.
- 192 9. Mitchell AL, Almeida A, Beracochea M, Boland M, Burgin J, Cochrane G, et al. MGnify: the  
193 microbiome analysis resource in 2020. *Nucleic acids research*. 2020;48(D1):D570–D578.
- 194 10. Levy Karin E, Mirdita M, Söding J. MetaEuk—sensitive, high-throughput gene discovery, and anno-  
195 tation for large-scale eukaryotic metagenomics. *Microbiome*. 2020;8(1):1–15.
- 196 11. Steinegger M, Söding J. Clustering huge protein sequence sets in linear time. *Nature communications*.  
197 2018;9(1):1–8.
- 198 12. Suzek BE, Wang Y, Huang H, McGarvey PB, Wu CH, Consortium U. UniRef clusters: a com-  
199 prehensive and scalable alternative for improving sequence similarity searches. *Bioinformatics*.  
200 2015;31(6):926–932.
- 201 13. Nordberg H, Cantor M, Dusheyko S, Hua S, Poliakov A, Shabalov I, et al. The genome portal of the De-  
202 partment of Energy Joint Genome Institute: 2014 updates. *Nucleic acids research*. 2014;42(D1):D26–  
203 D31.
- 204 14. Steinegger M, Söding J. MMseqs2 enables sensitive protein sequence searching for the analysis of  
205 massive data sets. *Nature biotechnology*. 2017;35(11):1026–1028.
- 206 15. Eddy SR. Accelerated profile HMM searches. *PLoS computational biology*. 2011;7(10):e1002195.
- 207 16. Mistry J, Chuguransky S, Williams L, Qureshi M, Salazar GA, Sonnhammer EL, et al. Pfam: The  
208 protein families database in 2021. *Nucleic acids research*. 2021;49(D1):D412–D419.

- 209 17. AlQuraishi M. ProteinNet: a standardized data set for machine learning of protein structure. BMC  
210 bioinformatics. 2019;20(1):1–10.
- 211 18. Notin P, Dias M, Frazer J, Hurtado JM, Gomez AN, Marks D, et al. Tranception: protein fitness  
212 prediction with autoregressive transformers and inference-time retrieval. In: International Conference  
213 on Machine Learning. PMLR; 2022. p. 16990–17017.
- 214 19. Berman HM, Battistuz T, Bhat TN, Bluhm WF, Bourne PE, Burkhardt K, et al. The Protein  
215 Data Bank. Acta Crystallographica Section D: Biological Crystallography. 2002 Jun;58(6):899–907.  
216 Available from: <http://scripts.iucr.org/cgi-bin/paper?an0594>.
- 217 20. Laine E, Karami Y, Carbone A. GEMME: a simple and fast global epistatic model predicting muta-  
218 tional effects. Molecular biology and evolution. 2019;36(11):2604–2619.
- 219 21. Hopf TA, Ingraham JB, Poelwijk FJ, Schärfe CP, Springer M, Sander C, et al. Mutation effects  
220 predicted from sequence co-variation. Nature biotechnology. 2017;35(2):128–135.
- 221 22. Frazer J, Notin P, Dias M, Gomez A, Min JK, Brock K, et al. Disease variant prediction with deep  
222 generative models of evolutionary data. Nature. 2021;599(7883):91–95.
- 223 23. Shin JE, Riesselman AJ, Kollasch AW, McMahon C, Simon E, Sander C, et al. Protein design and  
224 variant prediction using autoregressive generative models. Nature communications. 2021;12(1):1–11.
- 225 24. Trinquier J, Uguzzoni G, Pagnani A, Zamponi F, Weigt M. Efficient generative modeling of protein  
226 sequences using simple autoregressive models. Nature communications. 2021;12(1):1–11.
- 227 25. Riesselman AJ, Ingraham JB, Marks DS. Deep generative models of genetic variation capture the  
228 effects of mutations. Nature methods. 2018;15(10):816–822.
- 229 26. Marquet C, Heinzinger M, Olenyi T, Dallago C, Erckert K, Bernhofer M, et al. Embeddings from  
230 protein language models predict conservation and variant effects. Human genetics. 2021;p. 1–19.
- 231 27. Meier J, Rao R, Verkuil R, Liu J, Sercu T, Rives A. Language models enable zero-shot prediction  
232 of the effects of mutations on protein function. Advances in Neural Information Processing Systems.  
233 2021;34:29287–29303.
- 234 28. Rao R, Meier J, Sercu T, Ovchinnikov S, Rives A. Transformer protein language models are unsu-  
235 pervised structure learners. In: International Conference on Learning Representations; 2020. .
- 236 29. Olenyi T, Bernhofer M, Miridita M, Steinegger M, Rost B. Rostclust redundancy reduction.  
237 Manuscript in preparation. 2022;Department of Informatics, Technical University of Munich.
- 238 30. Mika S, Rost B. UniqueProt: creating representative protein sequence sets. Nucleic acids research.  
239 2003;31(13):3789–3791.
- 240 31. Consortium U, et al. UniProt: the universal protein knowledgebase. Nucleic acids research.  
241 2018;46(5):2699.

- 242 32. Kryshchak A, Schwede T, Topf M, Fidelis K, Moult J. Critical assessment of methods of protein  
243 structure prediction (CASP)—Round XIV. *Proteins: Structure, Function, and Bioinformatics*.  
244 2021;89(12):1607–1617.
- 245 33. Moult J, Fidelis K, Kryshchak A, Schwede T, Tramontano A. Critical assessment of methods of  
246 protein structure prediction (CASP)—Round XII. *Proteins: Structure, Function, and Bioinformatics*.  
247 2018;86:7–15.
- 248 34. Alexander H, Hu SK, Krinos AI, Pachiadaki M, Tully BJ, Neely CJ, et al. Eukaryotic genomes from a  
249 global metagenomic dataset illuminate trophic modes and biogeography of ocean plankton. *bioRxiv*.  
250 2022;p. 2021–07.
- 251 35. Howe KL, Achuthan P, Allen J, Allen J, Alvarez-Jarreta J, Amode MR, et al. Ensembl 2021. *Nucleic  
252 acids research*. 2021;49(D1):D884–D891.
- 253 36. Thurmond J, Goodman JL, Strelets VB, Attrill H, Gramates LS, Marygold SJ, et al. FlyBase 2.0:  
254 the next generation. *Nucleic acids research*. 2019;47(D1):D759–D765.
- 255 37. Davis P, Zarowiecki M, Arnaboldi V, Becerra A, Cain S, Chan J, et al. WormBase in 2022—data,  
256 processes, and tools for analyzing *Caenorhabditis elegans*. *Genetics*. 2022;220(4):iyac003.
- 257 38. Ekeberg M, Lökvist C, Lan Y, Weigt M, Aurell E. Improved contact prediction in proteins: using  
258 pseudolikelihoods to infer Potts models. *Physical Review E*. 2013;87(1):012707.
- 259 39. Steinegger M, Meier M, Mirdita M, Vöhringer H, Haunsberger SJ, Söding J. HH-suite3 for fast remote  
260 homology detection and deep protein annotation. *BMC bioinformatics*. 2019;20(1):1–15.

## 261 Supplementary methods

### 262 Alignment depth

263 We measured the alignment depth as the ratio of the effective number of sequences  $N_{eff}$  by the number of  
264 positions  $L$ . The effective number of sequences is computed as a sum of weights [38],

$$N_{eff} = \sum_s^N \pi_s, \quad (1)$$

265 where  $N$  is the number of sequences in the MSA and  $\pi_s$  is the weight assigned to sequence  $\mathbf{x}^{(s)}$ , computed  
266 as

$$\pi_s = \left( \sum_t^N I[D_H(\mathbf{x}^{(s)}, \mathbf{x}^{(t)}) < \theta_{ID}] \right)^{-1}, \quad (2)$$

267 where  $D_H(\mathbf{x}^{(s)}, \mathbf{x}^{(t)})$  is the normalised Hamming distance between the sequences  $\mathbf{x}^{(s)}$  and  $\mathbf{x}^{(t)}$  and  $\theta_{ID}$  is  
268 a predefined neighbourhood size (percent divergence). Hence, the weight of a given sequence reflects how  
269 dissimilar it is to the other sequences in the MSA. To be consistent with [18], we set  $\theta_{ID} = 0.2$  (80% sequence  
270 identity) for eukaryotic and prokaryotic proteins, and  $\theta_{ID} = 0.01$  (99% sequence identity) for viral proteins.

271 In [18], MSAs are labeled as Low, Medium or High depending on the ratio  $N_{eff}/L_{cov}$ , where  $L_{cov}$  is  
272 the number of positions with less than 30% gaps. Specifically, MSAs with  $N_{eff}/L_{cov} < 1$  are considered as  
273 shallow ('Low' group) whereas those with  $N_{eff}/L_{cov} > 100$  are considered as deep ('High' group). MSAs  
274 with  $1 < N_{eff}/L_{cov} < 100$  are in the intermediate 'Medium' group. In our calculations, we consider the  
275 ratio between  $N_{eff}$  and the total number of positions  $L$ , which is equal to the length of the target sequence  
276 for both ProteinGym and ColabFold MSAs.

### 277 Generating the predictions with GEMME

278 GEMME takes as input a FASTA-formatted MSA, with the ungapped query sequence on top. We used  
279 the tool *reformat.pl* from the HH-suite [39] to convert A2M and A3M alignment files into FASTA format.  
280 Moreover, we modified the MSAs from ProteinNet and Pfam by putting the sequence of interest on top and  
281 removing the insertions with respect to this sequence. We used GEMME's Docker image, available from  
282 <http://www.lcqb.upmc.fr/GEMME>, to compute the predictions. For the proteins with only single mutations,  
283 we predicted the full mutational landscape with the command: "python2.7 \$GEMME\_PATH/gemme.py  
284 aliXXX.fasta -r input -f aliXXX.fasta" where *aliXXX.fasta* is the input MSA file in FASTA format. For the  
285 proteins with multiple mutations, we predicted only the effects of the mutations of interest. To do so, we  
286 passed a file specifying the list of mutations as input with the option "-m". We used the default parameters  
287 for all proteins and all input MSAs.

### 288 Assessing and comparing the predictions

289 Assessing and comparing the predictions obtained from the ProteinGym and ColabFold MSAs was straight-  
290 forward since they cover the entire range of mutated positions and their query sequence is identical to the  
291 wild-type sequence used in the DMS. The MSAs from ProteinNet and Pfam however typically cover only  
292 a part of the mutated region and their query sequence sometimes display a few mutations with respect to

293 the DMS wild-type sequence. To compute the Spearman correlation, we restricted ourselves to the covered  
294 positions displaying the correct wild-type amino acid. When comparing two methods, we further reduced  
295 the calculation to their common positions.

## 296 **Supplementary tables and figures**

Table S1: **Coverage of the ProteinGym benchmark by the tested MSA generation protocols.** For each protein, we indicate its UniProt identifier, whether it is associated with measurements for multiple mutations, and whether the mutated region is covered by each of the tested protocols. We also give the PDB code selected for ProteinNet, and the number of Pfam domains (with available MSAs) overlapping with the mutated region.

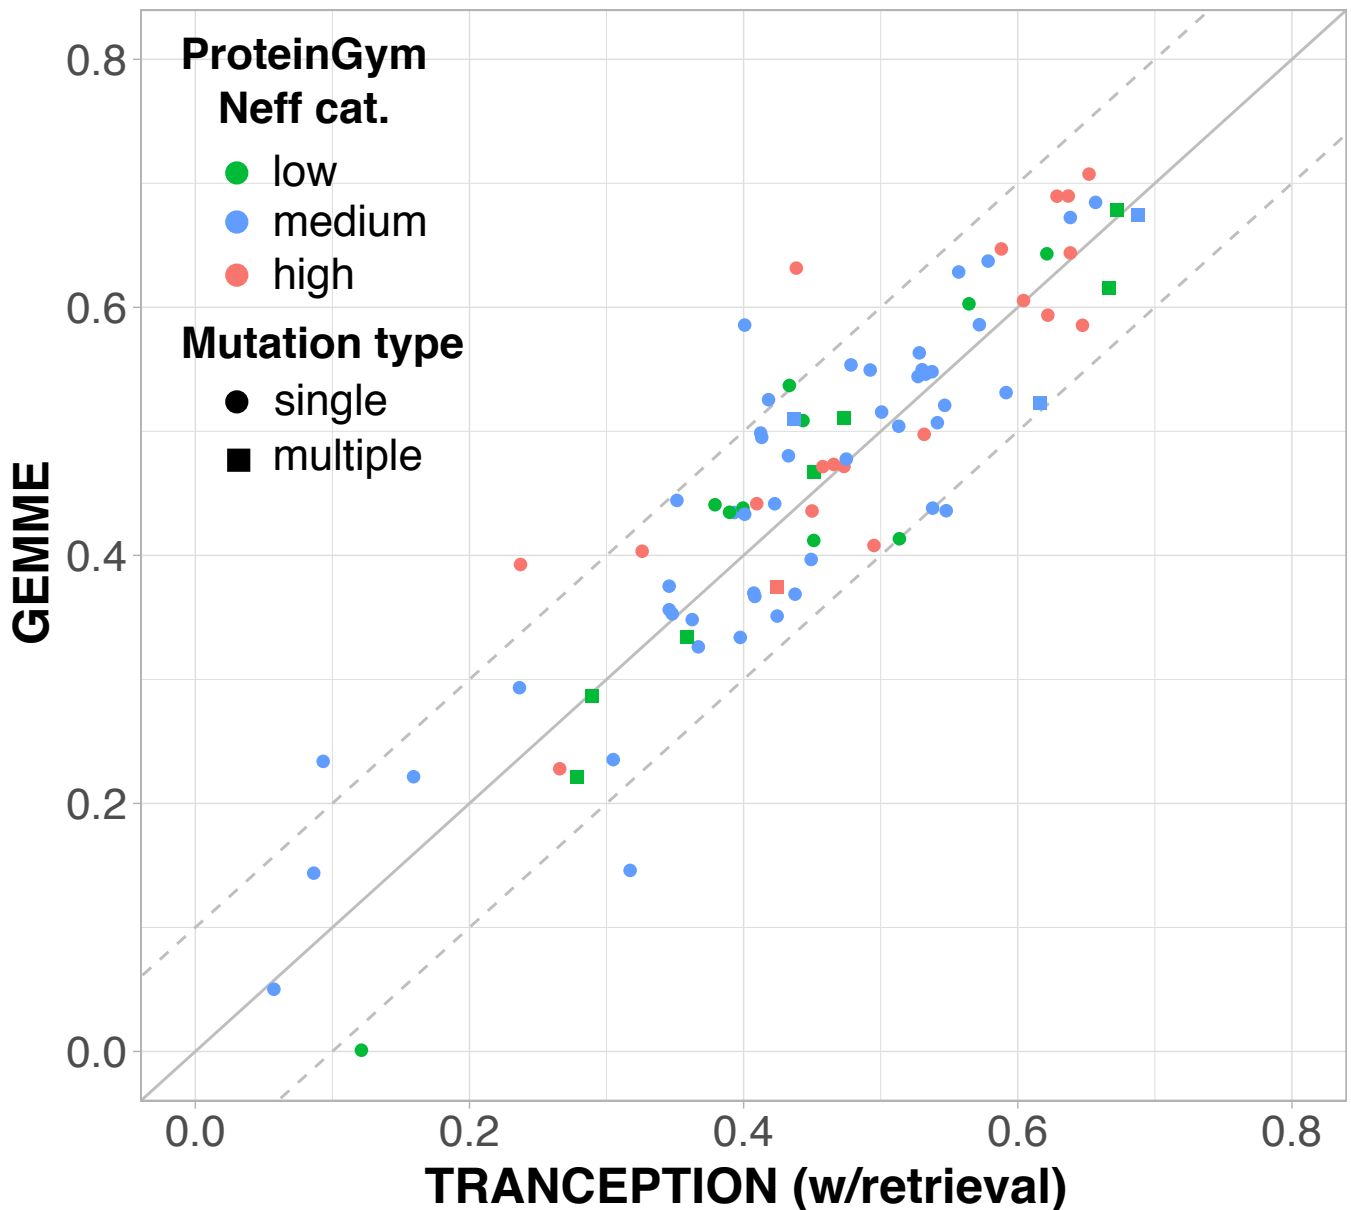

Figure S1: **Comparison of GEMME with the other mutational outcome predictor TRANCEPTION, given the same input MSAs.** Spearman rank correlation coefficients ( $\rho$ ) are reported for the 87 DMS from the ProteinGym benchmark, using the ProteinGym MSAs as input (**Table 1**, see *ProteinGym*). The version of TRANCEPTION used here (with retrieval) combines a protein language model trained across families with information coming from a query-specific MSA retrieved at inference time [18]. The plotted values were taken from [18], where TRANCEPTION was shown to outperform Wavenet [23], DeepSequence [25], EVmutation [21], EVE [22], EMS-1v [27], and MSA Transformer [28]. GEMME predictions were generated using default parameters. The colors indicate the alignment depth categories defined in [18] (see also *Materials and Methods*). The shapes indicate whether the experiment contains only single mutations (circle) or also multiple mutations (square).

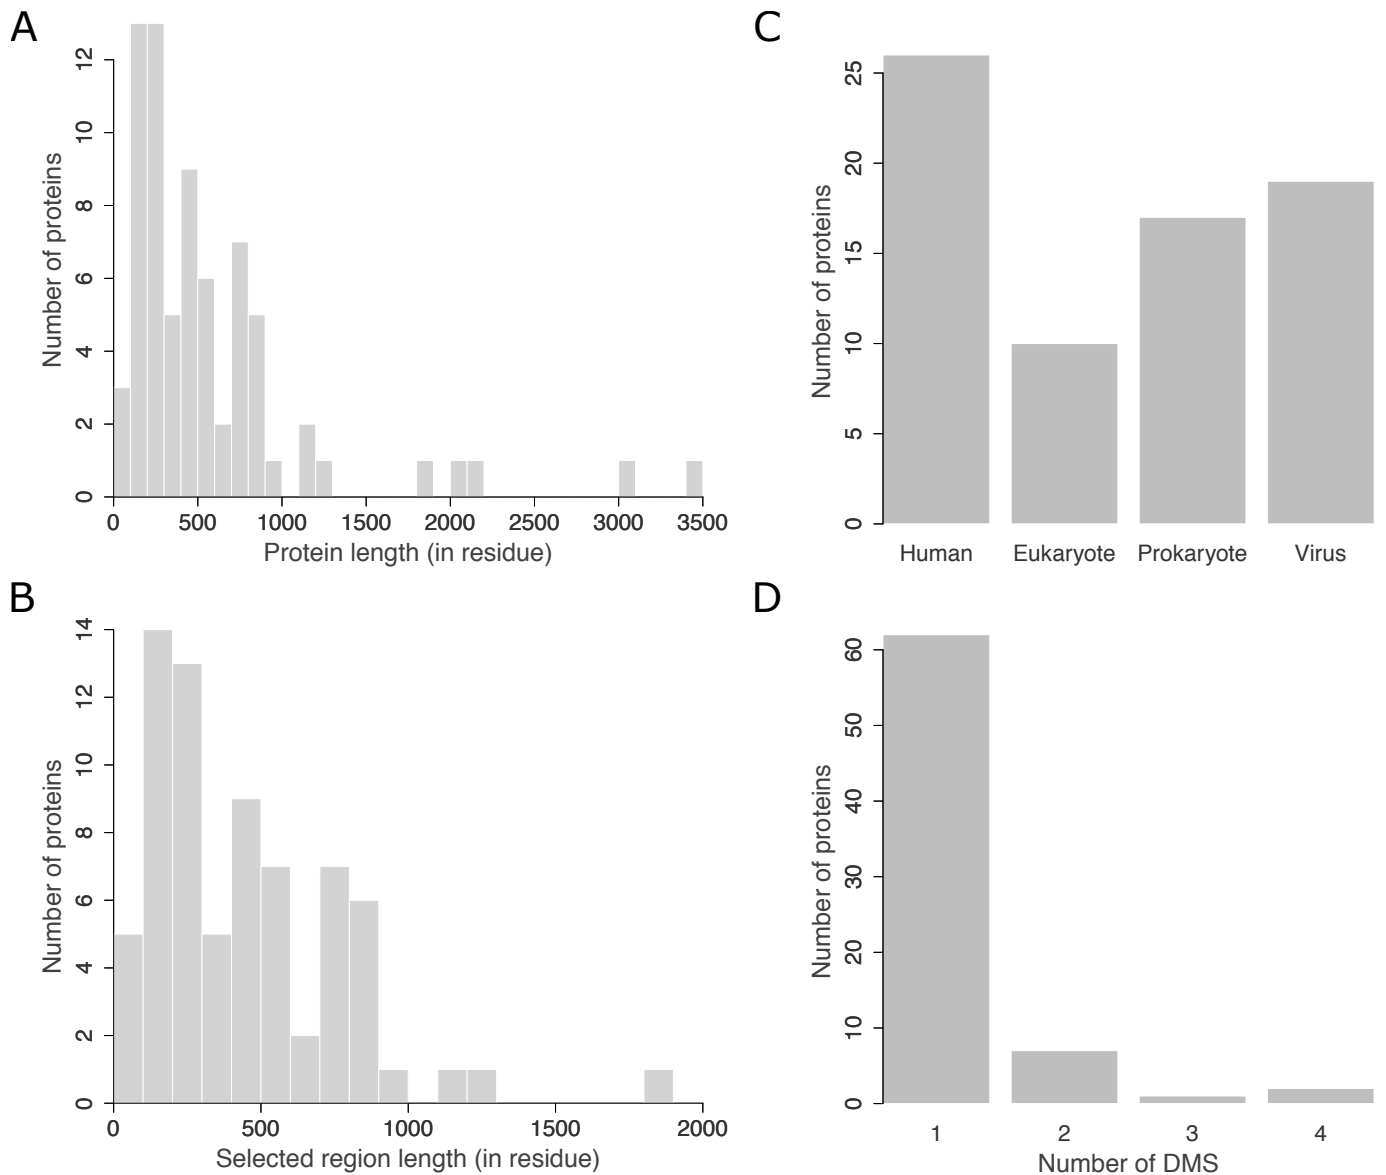

Figure S2: **ProteinGym benchmark properties.** **A.** Distribution of the length (in number of residues) of the 73 target protein sequences from the benchmark. **B.** Distribution of the length (in number of residues) of the protein regions covered by ProteinGym MSAs. **C.** Taxonomic classification of the proteins. The label "Eukaryote" refers to non-human eukaryotes. **D.** Distribution of the number of reported experiments per protein.



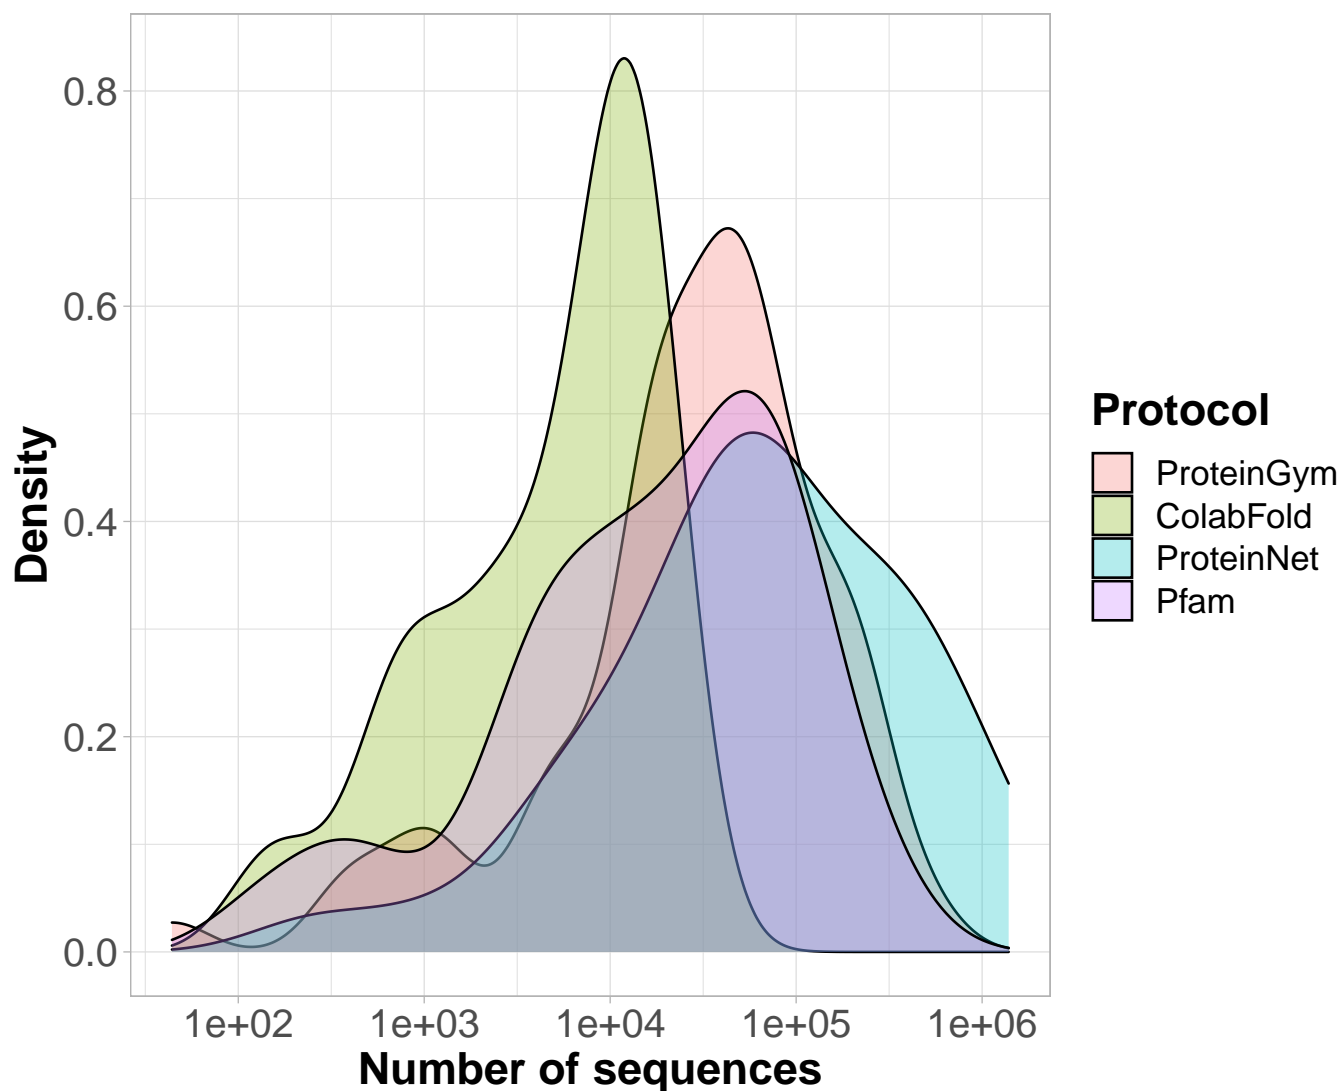

Figure S3: **Distribution of the number of sequences per MSA depending on the protocol.** The total number of MSAs varies from one protocol to another (see full details in **Table 1**).

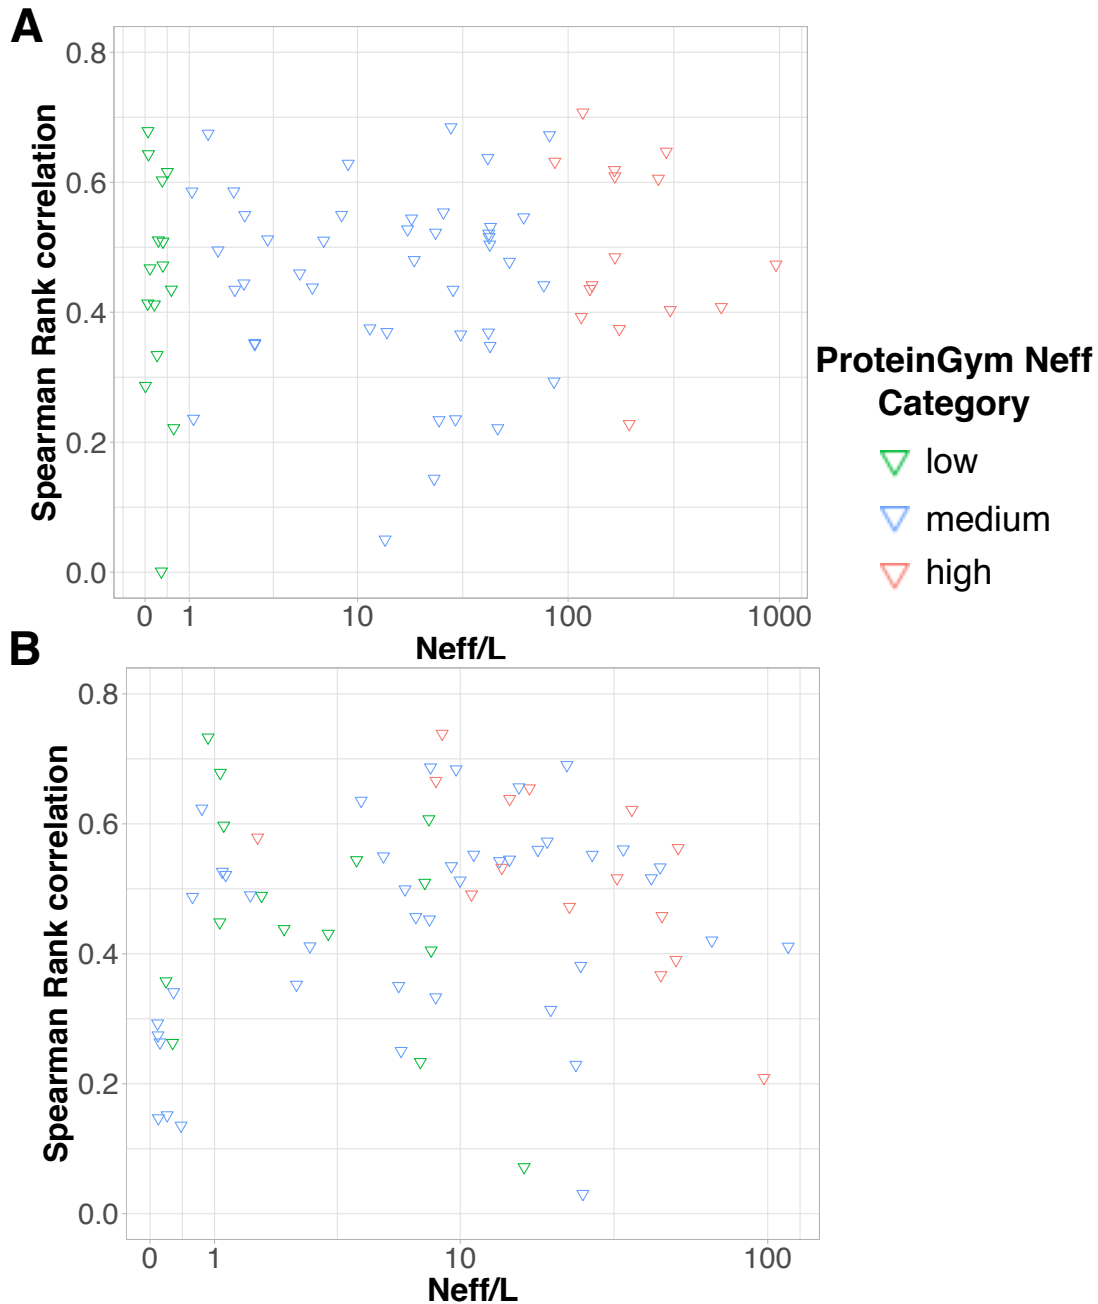

Figure S4: **Prediction accuracy in function of the alignment depth.** The input MSAs were generated using ProteinGym (A) or ColabFold (B) protocol. Each point (triangle) corresponds to a given input MSA (*i.e.* a given target sequence) and its y-value is averaged over the set of DMS experiments (between 1 and 4, see Fig. S2) associated to it. The Spearman correlations computed between the y ( $\rho$ ) and log-x ( $\log N_{eff}/L$ ) values are 0.065 and 0.225 for ProteinGym (A) and ColabFold (B), respectively. The colors indicate the ProteinGym  $N_{eff}$  categories, as defined in [18] (see also *Materials and Methods*). About half of the target sequences change category between the two protocols (see all red points, and also the blue points with a ratio lower than 1 and the green points with a ratio above 1 on panel B).

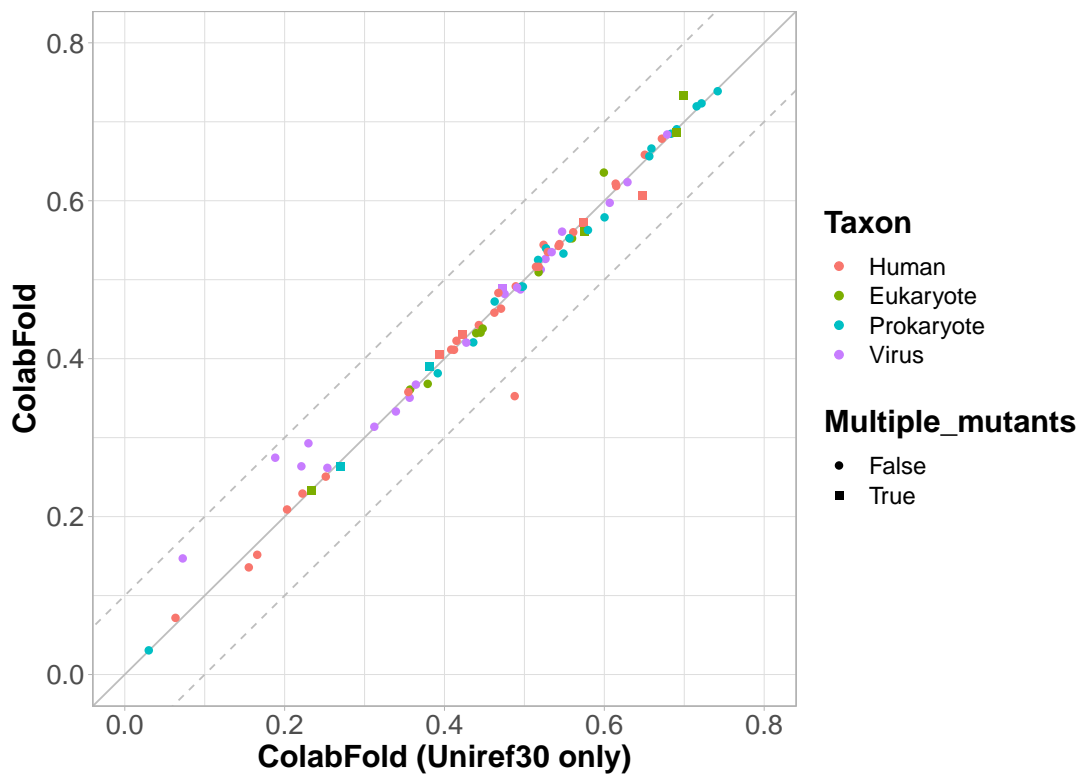

Figure S5: **Influence of the search database on GEMME performance.** The input MSAs were generated using the Colabfold protocol, considering only the UniRef30 database (x-axis) or both the UniRef30 database and the ColabFold database (y-axis). The values are reported for 86 out of the 87 DMS from ProteinGym. The DMS associated with SC6A4 is missing because the MSA generated from the UniRef30 database only was too shallow to compute reliable evolutionary conservation levels.

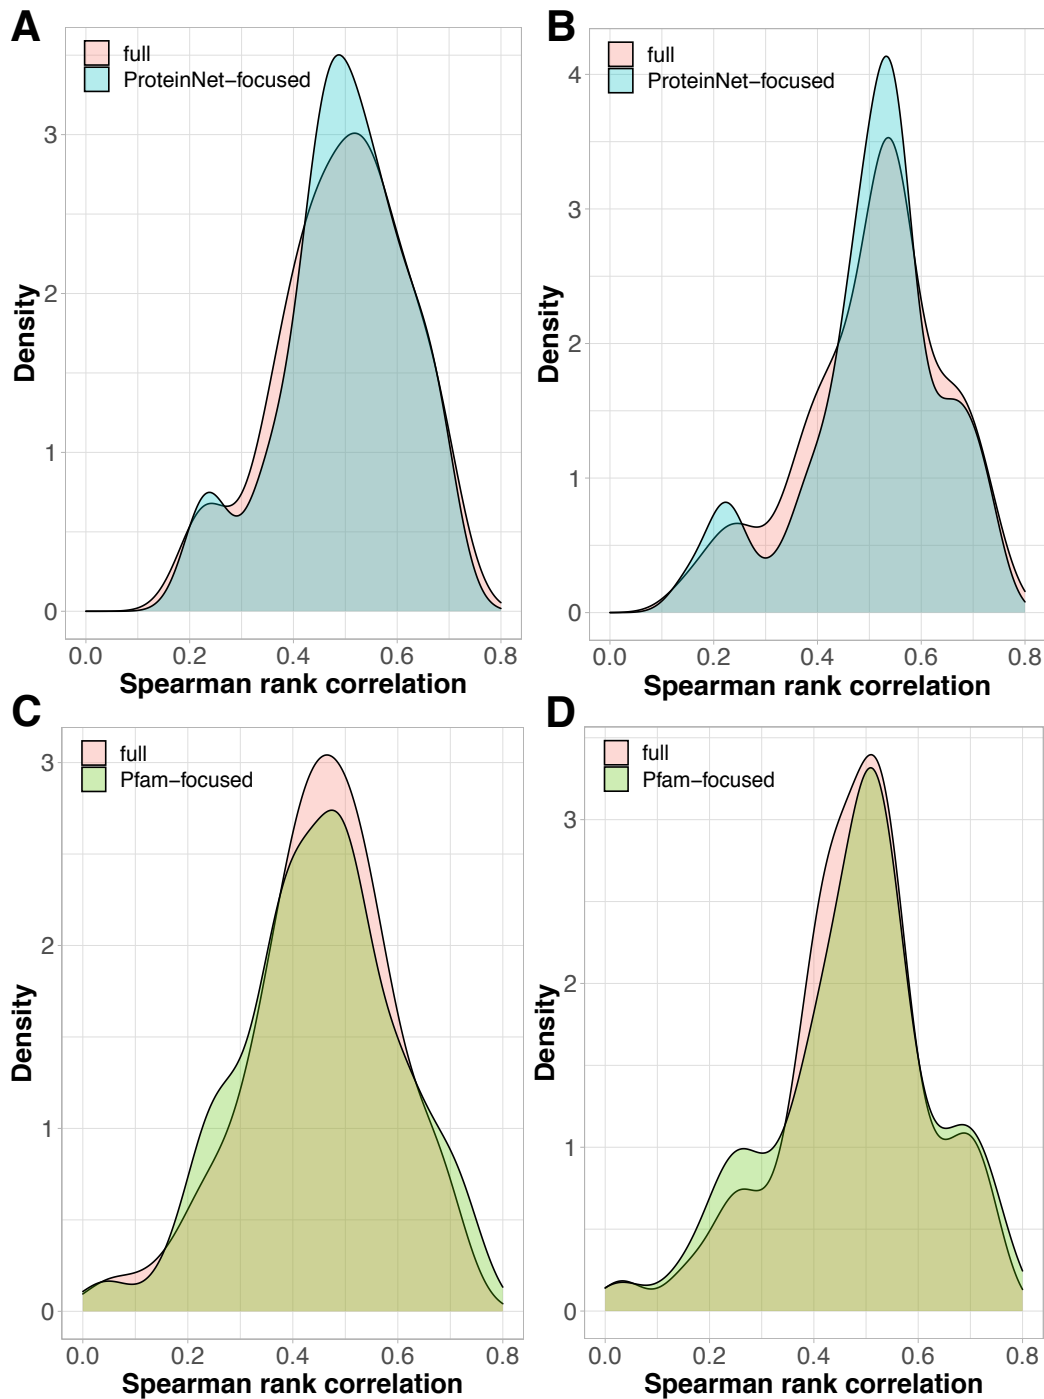

Figure S6: **Prediction accuracy achieved on the full-length versus partial proteins.** Distributions of Spearman rank correlations obtained with the ProteinGym (A,C) and ColabFold (B,D) protocols. **A-B.** Each distribution contains 51 values corresponding to the 51 DMS covered by ProteinNet. The correlations computed over the full-length proteins (in pink) are compared to those computed over the regions covered by ProteinNet (in blue). **C-D.** Each distribution contains 52 values corresponding to the 52 DMS covered by Pfam. The correlations computed over the full-length proteins (in pink) are compared to those computed over the regions covered by Pfam (in green).

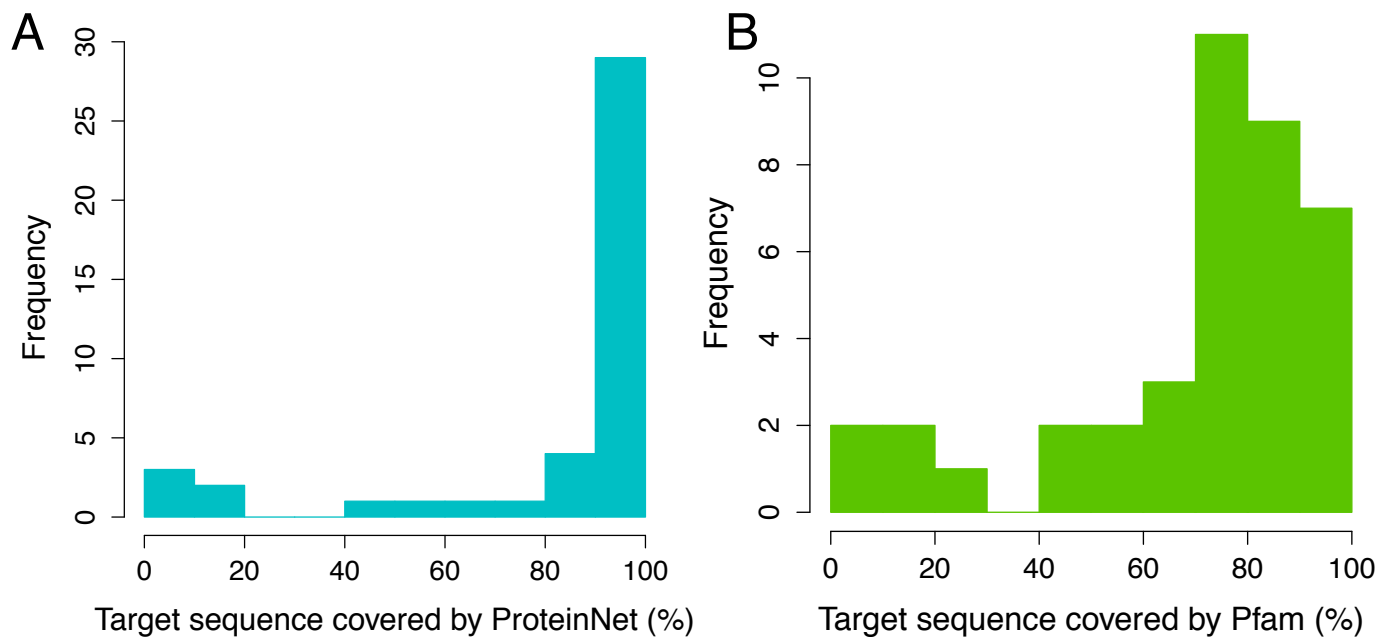

Figure S7: **Protein coverage from the ProteinNet and Pfam MSAs.** Percentage of residues from the target sequences covered by the MSAs from ProteinNet (**A**) and Pfam (**B**).
